# Supplementary material
Source: ML conference proceedings conference paper supplement (https://proceedings.neurips.cc/paper_files/paper/2023/hash/e444859b2a22df6b56af9381ad1e9480-Abstract.html)
Supplement: Supplementary file 1 [file e444859b2a22df6b56af9381ad1e9480-Supplemental-Conference.zip]

Archive with 2 entries (2 files):
- covariance_estimation_with_missing_observation.pdf
- __MACOSX/._covariance_estimation_with_missing_observation.pdf
